# Supplementary material
Source: publisher figshare collection journal article supplement (https://rs.figshare.com/ndownloader/files/19167401)
Supplement: Supplementary file 1 [file 19167401]

## Sheet: Sheet1
ESM Table 2. Habitat type and location and the temperature, pH, and dissolved H2 concentrations in specified environments.
Habitat	Category (see Fig. 2)	Temperature (°C)	pH	Dissolved H2 (mol L-1)	Reference
Lost City hydrothermal field, Mid-Atlantic Ridge	Lost City	94	12.1	0.0078	https://agupubs.onlinelibrary.wiley.com/doi/10.1029/2008GM000752
Well NSHQ14 sampled in 2014, Oman	Oman	34.9	11.4	0.00067	https://www.frontiersin.org/articles/10.3389/fmicb.2017.00056/full
Well NSHQ14 sampled in 2015, Oman	Oman	35.3	11.3	0.0029	https://www.frontiersin.org/articles/10.3389/fmicb.2017.00056/full
Well NSHQ14 sampled in 2016, Oman	Oman	35.8	11.2	0.00022	https://www.frontiersin.org/articles/10.3389/fmicb.2017.00056/full
Well NSHQ4 sampled in 2014, Oman	Oman	33.3	10.6	0.00018	https://www.frontiersin.org/articles/10.3389/fmicb.2017.00056/full
Calcite Springs, Yellowstone National Park, U.S.A.	Hot Spring	90	7.5	2.2e-08	http://www.rcn.montana.edu/Publications/Pdf/2005/2_7Reysenbach.pdf
Calcite Springs, Yellowstone National Park, U.S.A.	Hot Spring	65	7.5	2.3e-09	http://www.rcn.montana.edu/Publications/Pdf/2005/2_7Reysenbach.pdf
Calcite Springs, Yellowstone National Park, U.S.A.	Hot Spring	63	3.1	6e-08	http://www.rcn.montana.edu/Publications/Pdf/2005/InskeepGalley1.pdf
Succession Spring, Yellowstone National Park, U.S.A.	Hot Spring	75	3.1	5.5e-08	http://www.rcn.montana.edu/Publications/Pdf/2005/InskeepGalley1.pdf
Well Y-7, Yellowstone National Park, U.S.A.	Hot Spring	55	7	3.8e-09	http://www.pnas.org/content/102/7/2555
West Thumb Pool, Yellowstone National Park, U.S.A.	Hot Spring	89	7.3	1.55e-08	http://www.pnas.org/content/102/7/2556
Washburn Spring #3, Yellowstone National Park, U.S.A.	Hot Spring	86	6.2	1.85e-08	http://www.pnas.org/content/102/7/2557
Queen's Laundry, Yellowstone National Park, U.S.A.	Hot Spring	89	8	3.04e-08	http://www.pnas.org/content/102/7/2558
Cinder Pool, Yellowstone National Park, U.S.A.	Hot Spring	88	4.2	7.76e-08	http://www.pnas.org/content/102/7/2559
Washburn Spring #1, Yellowstone National Park, U.S.A.	Hot Spring	76	6.7	1.031e-07	http://www.pnas.org/content/102/7/2560
Obsidian Pool, Yellowstone National Park, U.S.A.	Hot Spring	80	6.5	1.332e-07	http://www.pnas.org/content/102/7/2561
Obsidian Pool Prime, Yellowstone National Park, U.S.A.	Hot Spring	74	5.7	3.253e-07	http://www.pnas.org/content/102/7/2562
Roadside East 1, Yellowstone National Park, U.S.A.	Hot Spring	82.4	3	2.7262e-07	https://onlinelibrary.wiley.com/doi/full/10.1111/gbi.12308
Roadside East 2, Yellowstone National Park, U.S.A.	Hot Spring	72.6	2.9	4.976e-08	https://onlinelibrary.wiley.com/doi/full/10.1111/gbi.12308
Roadside East 3, Yellowstone National Park, U.S.A.	Hot Spring	59.6	3	3.841e-08	https://onlinelibrary.wiley.com/doi/full/10.1111/gbi.12308
Roadside East 4, Yellowstone National Park, U.S.A.	Hot Spring	51.9	2.9	1.006e-08	https://onlinelibrary.wiley.com/doi/full/10.1111/gbi.12308
Roadside East 5, Yellowstone National Park, U.S.A.	Hot Spring	42.7	2.9	1.107e-08	https://onlinelibrary.wiley.com/doi/full/10.1111/gbi.12308
Roadside West 1, Yellowstone National Park, U.S.A.	Hot Spring	68.1	7	1.6842e-07	https://onlinelibrary.wiley.com/doi/full/10.1111/gbi.12308
Roadside West 2, Yellowstone National Park, U.S.A.	Hot Spring	64.3	7	7.412e-08	https://onlinelibrary.wiley.com/doi/full/10.1111/gbi.12308
Roadside West 3, Yellowstone National Park, U.S.A.	Hot Spring	58.5	7.1	2.429e-08	https://onlinelibrary.wiley.com/doi/full/10.1111/gbi.12308
Roadside West 4, Yellowstone National Park, U.S.A.	Hot Spring	44.1	7.2	4.078e-08	https://onlinelibrary.wiley.com/doi/full/10.1111/gbi.12308
Smokejumper 1, Yellowstone National Park, U.S.A.	Hot Spring	81.7	6.53	7.7e-07	https://onlinelibrary.wiley.com/doi/full/10.1111/gbi.12308
Smokejumper 2, Yellowstone National Park, U.S.A.	Hot Spring	81.5	7.56	4.7e-07	https://onlinelibrary.wiley.com/doi/full/10.1111/gbi.12308
Smokejumper 3, Yellowstone National Park, U.S.A.	Hot Spring	61.9	5.36	1.87e-06	https://onlinelibrary.wiley.com/doi/full/10.1111/gbi.12308
Yellowstone Lake, Smokejumper 1, Yellowstone National Park, U.S.A.	Hot Spring	9	7	4.3e-09	http://www.pnas.org/content/102/7/2562
Subglacial Environment in Iceland	Subglacial	0.8	6.76	4.26e-07	E.S. Boyd, unpublished
Subglacial Environment in Canada	Subglacial	0.4	8.4	4e-08	https://repository.asu.edu/attachments/176572/content/Canovas_asu_0010E_16611.pdf
Well CSW1, Coast Range Ophiolite Microbial Observatory, U.S.A.	CROMO	13.66	12.38	5.509e-07	T.M. Hoehler unpublished
Well CSW1, Coast Range Ophiolite Microbial Observatory, U.S.A.	CROMO	14.99	12.3	5.208e-07	T.M. Hoehler unpublished
Well CSW1, Coast Range Ophiolite Microbial Observatory, U.S.A.	CROMO	16.1	12.15	2.887e-07	T.M. Hoehler unpublished
Well CSW1, Coast Range Ophiolite Microbial Observatory, U.S.A.	CROMO	14.87	12.36	3.1723e-06	T.M. Hoehler unpublished
Well CSW1, Coast Range Ophiolite Microbial Observatory, U.S.A.	CROMO	14.78	12.18	1.28e-08	T.M. Hoehler unpublished
Well CSW1, Coast Range Ophiolite Microbial Observatory, U.S.A.	CROMO	16.21	12.39	1.98e-07	T.M. Hoehler unpublished
Well CSW2, Coast Range Ophiolite Microbial Observatory, U.S.A.	CROMO	17.57	9.61	3.785e-07	T.M. Hoehler unpublished
Well CSW2, Coast Range Ophiolite Microbial Observatory, U.S.A.	CROMO	14.81	8.77	1.67e-08	T.M. Hoehler unpublished
Well CSW2, Coast Range Ophiolite Microbial Observatory, U.S.A.	CROMO	14.8	8.68	2.04e-07	T.M. Hoehler unpublished
Well CSW2, Coast Range Ophiolite Microbial Observatory, U.S.A.	CROMO	16.78	10.11	6.603e-07	T.M. Hoehler unpublished
Well CSW2, Coast Range Ophiolite Microbial Observatory, U.S.A.	CROMO	16.662	10.12	2.837e-07	T.M. Hoehler unpublished
Well CSW2, Coast Range Ophiolite Microbial Observatory, U.S.A.	CROMO	14.56	10.15	2.5925e-06	T.M. Hoehler unpublished
Well CSW2, Coast Range Ophiolite Microbial Observatory, U.S.A.	CROMO	15.17	10.1	1.08597e-05	T.M. Hoehler unpublished
Well CSW2, Coast Range Ophiolite Microbial Observatory, U.S.A.	CROMO	16.42	10.2	4.82e-08	T.M. Hoehler unpublished
Well CSW4, Coast Range Ophiolite Microbial Observatory, U.S.A.	CROMO	13.81	7.77	7.505e-07	T.M. Hoehler unpublished
Well CSW4, Coast Range Ophiolite Microbial Observatory, U.S.A.	CROMO	15.01	7.84	1.306e-07	T.M. Hoehler unpublished
Well CSW4, Coast Range Ophiolite Microbial Observatory, U.S.A.	CROMO	15.22	8	2.714e-07	T.M. Hoehler unpublished
Well CSW4, Coast Range Ophiolite Microbial Observatory, U.S.A.	CROMO	14.24	7.77	1.18e-08	T.M. Hoehler unpublished
Well CSW5, Coast Range Ophiolite Microbial Observatory, U.S.A.	CROMO	13.8	10.11	9.001e-07	T.M. Hoehler unpublished
Well CSW5, Coast Range Ophiolite Microbial Observatory, U.S.A.	CROMO	16.49	9.86	1.362e-07	T.M. Hoehler unpublished
Well CSW5, Coast Range Ophiolite Microbial Observatory, U.S.A.	CROMO	16.37	9.63	1.381e-07	T.M. Hoehler unpublished
Well CSW5, Coast Range Ophiolite Microbial Observatory, U.S.A.	CROMO	15.94	9.83	3.465e-07	T.M. Hoehler unpublished
